# Supplementary material for: Impacts of different fencing periods and grazing intensities on insect diversity in the desert steppe in Inner Mongolia
Source: Frontiers journal article supplement (doi:10.3389/fevo.2022.1021677), 2022-11-30
Supplement: Table_2.xlsx [file Table_2.xlsx]

## Sheet: origin_Plant_Index
Table S2. Plant species in each plot in a desert grassland in Inner Mongolia.
Fencing	Plot	Rep	Grazing	Plant	Count
7	3	3	CK	Heteropappus altaicus	1
7	3	1	LG	Heteropappus altaicus	1
7	3	1	HG	Heteropappus altaicus	1
7	3	2	HG	Heteropappus altaicus	1
7	3	3	HG	Heteropappus altaicus	1
3	4	2	CK	Heteropappus altaicus	1
3	4	3	LG	Heteropappus altaicus	1
3	4	1	HG	Heteropappus altaicus	1
3	5	1	CK	Heteropappus altaicus	1
3	5	2	CK	Heteropappus altaicus	1
3	5	3	CK	Heteropappus altaicus	1
3	5	2	LG	Heteropappus altaicus	1
7	6	1	LG	Heteropappus altaicus	1
7	6	1	HG	Heteropappus altaicus	1
3	2	2	HG	Artemisia caespitosa	1
3	5	3	LG	Scirpus pumilus	1
7	1	1	CK	stragalus leucocephalus	1
7	1	1	HG	stragalus leucocephalus	1
3	2	1	HG	stragalus leucocephalus	1
3	2	2	HG	stragalus leucocephalus	1
3	2	3	HG	stragalus leucocephalus	1
3	4	2	CK	stragalus leucocephalus	1
3	4	1	HG	stragalus leucocephalus	1
3	4	2	HG	stragalus leucocephalus	1
3	4	3	HG	stragalus leucocephalus	1
3	5	1	HG	stragalus leucocephalus	1
7	6	1	LG	stragalus leucocephalus	1
7	6	2	LG	stragalus leucocephalus	1
7	6	2	HG	stragalus leucocephalus	1
3	4	2	LG	Thalictrum petaloideum	1
3	2	1	CK	Haplophyllum dauricum	1
3	2	2	CK	Haplophyllum dauricum	1
3	2	1	LG	Haplophyllum dauricum	1
3	2	2	LG	Haplophyllum dauricum	1
3	2	3	LG	Haplophyllum dauricum	1
7	3	1	CK	Haplophyllum dauricum	1
7	3	3	HG	Haplophyllum dauricum	1
3	4	1	CK	Haplophyllum dauricum	1
3	4	2	LG	Haplophyllum dauricum	1
3	5	2	LG	Haplophyllum dauricum	1
3	5	3	LG	Haplophyllum dauricum	1
7	6	2	LG	Haplophyllum dauricum	1
7	3	1	CK	Agropyron cristatum	1
7	3	3	CK	Agropyron cristatum	1
7	3	1	LG	Agropyron cristatum	1
7	3	2	LG	Agropyron cristatum	1
7	3	3	LG	Agropyron cristatum	1
7	3	1	HG	Agropyron cristatum	1
7	3	2	HG	Agropyron cristatum	1
7	3	3	HG	Agropyron cristatum	1
3	4	1	CK	Agropyron cristatum	1
3	4	2	CK	Agropyron cristatum	1
3	4	3	CK	Agropyron cristatum	1
3	4	1	LG	Agropyron cristatum	1
3	4	3	LG	Agropyron cristatum	1
7	6	3	LG	Astragalus scaberrimus	1
7	3	1	HG	Cleistogenes squarrosa	1
7	3	2	HG	Cleistogenes squarrosa	1
3	5	2	CK	Cleistogenes squarrosa	1
3	5	2	LG	Cleistogenes squarrosa	1
3	5	3	LG	Cleistogenes squarrosa	1
3	5	3	HG	Cleistogenes squarrosa	1
7	6	2	LG	Cleistogenes squarrosa	1
7	6	3	LG	Cleistogenes squarrosa	1
7	6	1	HG	Cleistogenes squarrosa	1
7	6	2	HG	Cleistogenes squarrosa	1
7	6	1	LG	Melilotus officinalis	1
7	3	2	CK	Astragalus arkalycensis	1
3	2	2	CK	Oxytropis aciphylla	1
3	2	1	LG	Oxytropis aciphylla	1
3	2	3	LG	Oxytropis aciphylla	1
3	2	2	HG	Oxytropis aciphylla	1
3	5	1	CK	Oxytropis aciphylla	1
3	5	2	CK	Oxytropis aciphylla	1
3	5	3	CK	Oxytropis aciphylla	1
3	5	1	LG	Oxytropis aciphylla	1
3	5	2	LG	Oxytropis aciphylla	1
3	5	1	HG	Oxytropis aciphylla	1
3	5	2	HG	Oxytropis aciphylla	1
3	5	3	HG	Oxytropis aciphylla	1
7	6	1	LG	Oxytropis aciphylla	1
7	6	3	LG	Oxytropis aciphylla	1
7	6	1	HG	Oxytropis aciphylla	1
7	6	2	HG	Oxytropis aciphylla	1
7	6	3	HG	Oxytropis aciphylla	1
7	1	1	CK	Carex duriuscula	1
7	1	1	HG	Carex duriuscula	1
3	2	1	CK	Carex duriuscula	1
7	3	2	CK	Carex duriuscula	1
3	4	1	CK	Carex duriuscula	1
3	4	2	CK	Carex duriuscula	1
3	4	3	CK	Carex duriuscula	1
3	4	1	LG	Carex duriuscula	1
3	4	2	LG	Carex duriuscula	1
3	4	3	LG	Carex duriuscula	1
3	4	1	HG	Carex duriuscula	1
3	4	2	HG	Carex duriuscula	1
3	4	3	HG	Carex duriuscula	1
3	5	2	CK	Carex duriuscula	1
3	5	3	CK	Carex duriuscula	1
3	5	1	HG	Carex duriuscula	1
3	5	2	HG	Carex duriuscula	1
3	5	3	HG	Carex duriuscula	1
7	6	3	LG	Carex duriuscula	1
3	5	1	CK	Lespedeza daurica	1
3	5	2	CK	Lespedeza daurica	1
3	5	3	CK	Lespedeza daurica	1
3	5	1	LG	Lespedeza daurica	1
3	5	2	LG	Lespedeza daurica	1
7	6	2	LG	Lespedeza daurica	1
7	6	3	LG	Lespedeza daurica	1
7	6	1	HG	Lespedeza daurica	1
3	2	1	CK	Cymbaria daurica	1
3	2	3	CK	Cymbaria daurica	1
3	2	2	LG	Cymbaria daurica	1
3	2	3	LG	Cymbaria daurica	1
7	3	1	CK	Cymbaria daurica	1
7	3	2	CK	Cymbaria daurica	1
7	3	3	CK	Cymbaria daurica	1
7	3	2	LG	Cymbaria daurica	1
7	3	2	HG	Cymbaria daurica	1
7	3	3	HG	Cymbaria daurica	1
3	4	1	CK	Cymbaria daurica	1
3	4	2	CK	Cymbaria daurica	1
3	4	1	HG	Cymbaria daurica	1
3	4	2	HG	Cymbaria daurica	1
3	5	3	CK	Cymbaria daurica	1
3	5	1	LG	Cymbaria daurica	1
3	5	3	LG	Cymbaria daurica	1
3	5	2	HG	Cymbaria daurica	1
7	6	2	LG	Cymbaria daurica	1
7	6	2	HG	Euphorbia humifusa	1
3	4	3	CK	Cynanchum thesioides	1
7	1	1	LG	Lagochilus ilicifolius	1
7	1	2	LG	Lagochilus ilicifolius	1
7	1	3	LG	Lagochilus ilicifolius	1
7	6	2	LG	Lagochilus ilicifolius	1
7	6	1	HG	Lagochilus ilicifolius	1
7	6	2	HG	Lagochilus ilicifolius	1
7	6	3	HG	Lagochilus ilicifolius	1
7	3	3	LG	Stipa breviflora	1
7	3	1	HG	Stipa breviflora	1
7	3	2	HG	Stipa breviflora	1
3	4	1	LG	Stipa breviflora	1
3	4	3	LG	Stipa breviflora	1
3	5	1	CK	Stipa breviflora	1
3	5	2	CK	Stipa breviflora	1
3	5	3	CK	Stipa breviflora	1
3	5	1	LG	Stipa breviflora	1
3	5	1	HG	Stipa breviflora	1
3	5	2	HG	Stipa breviflora	1
3	5	3	HG	Stipa breviflora	1
7	6	1	HG	Stipa breviflora	1
7	6	2	HG	Stipa breviflora	1
7	3	2	CK	Potentilla bifurca	1
3	2	2	LG	Saposhnikovia divaricata	1
3	2	3	LG	Saposhnikovia divaricata	1
7	3	3	CK	Saposhnikovia divaricata	1
7	6	3	LG	Tragus mongolorum	1
7	6	2	HG	Tragus mongolorum	1
7	6	3	HG	Tragus mongolorum	1
7	1	1	LG	Asparagus gobicus	1
7	1	2	LG	Asparagus gobicus	1
7	1	3	LG	Asparagus gobicus	1
3	2	3	CK	Asparagus gobicus	1
3	2	3	HG	Asparagus gobicus	1
7	3	1	LG	Asparagus gobicus	1
3	4	1	CK	Asparagus gobicus	1
3	4	2	CK	Asparagus gobicus	1
3	4	1	LG	Asparagus gobicus	1
3	4	3	LG	Asparagus gobicus	1
7	6	3	HG	Asparagus gobicus	1
3	2	1	CK	Stipa tianschanica	1
3	2	2	CK	Stipa tianschanica	1
3	2	3	CK	Stipa tianschanica	1
3	2	1	LG	Stipa tianschanica	1
3	2	2	LG	Stipa tianschanica	1
3	2	3	LG	Stipa tianschanica	1
7	3	1	CK	Stipa tianschanica	1
7	3	2	CK	Stipa tianschanica	1
7	3	3	CK	Stipa tianschanica	1
7	3	1	LG	Stipa tianschanica	1
7	3	2	LG	Stipa tianschanica	1
7	3	3	LG	Stipa tianschanica	1
3	4	1	CK	Stipa tianschanica	1
3	4	2	CK	Stipa tianschanica	1
3	4	2	LG	Stipa tianschanica	1
3	4	1	HG	Stipa tianschanica	1
3	4	2	HG	Stipa tianschanica	1
3	4	3	HG	Stipa tianschanica	1
3	5	1	LG	Stipa tianschanica	1
3	5	2	HG	Stipa tianschanica	1
7	6	1	HG	Stipa tianschanica	1
7	6	3	HG	Stipa tianschanica	1
7	1	1	CK	Setaria viridis	1
7	1	1	LG	Setaria viridis	1
3	2	2	LG	Setaria viridis	1
3	2	3	LG	Setaria viridis	1
7	3	1	HG	Setaria viridis	1
3	4	2	CK	Setaria viridis	1
3	4	1	LG	Setaria viridis	1
3	4	3	LG	Setaria viridis	1
3	5	1	CK	Setaria viridis	1
3	5	3	CK	Setaria viridis	1
3	5	1	HG	Setaria viridis	1
3	5	3	HG	Setaria viridis	1
7	6	2	LG	Setaria viridis	1
3	4	2	LG	Enneapogon borealis	1
3	4	1	HG	Enneapogon borealis	1
3	4	2	HG	Enneapogon borealis	1
3	4	3	HG	Enneapogon borealis	1
3	5	1	CK	Enneapogon borealis	1
3	5	2	CK	Enneapogon borealis	1
7	6	1	LG	Enneapogon borealis	1
7	6	3	LG	Enneapogon borealis	1
7	6	1	HG	Enneapogon borealis	1
7	6	2	HG	Enneapogon borealis	1
7	3	1	LG	Ajania salicifolia	1
7	3	1	CK	Artemisia halodendron	1
3	4	3	CK	Bupleurum scorzonerifolium	1
7	1	1	CK	Achnatherum splendens	1
3	2	1	CK	Achnatherum splendens	1
3	2	3	CK	Achnatherum splendens	1
3	2	1	HG	Achnatherum splendens	1
3	2	2	HG	Achnatherum splendens	1
3	2	3	HG	Achnatherum splendens	1
3	5	1	HG	Achnatherum splendens	1
7	6	1	LG	Achnatherum splendens	1
7	6	2	LG	Achnatherum splendens	1
7	6	1	HG	Achnatherum splendens	1
3	5	1	CK	Tribulus terrestris	1
3	5	3	CK	Tribulus terrestris	1
7	6	2	LG	Tribulus terrestris	1
7	6	1	HG	Tribulus terrestris	1
7	6	2	HG	Tribulus terrestris	1
7	6	3	HG	Tribulus terrestris	1
7	1	2	LG	Artemisia frigida	1
3	2	1	CK	Artemisia frigida	1
3	2	2	CK	Artemisia frigida	1
3	2	1	LG	Artemisia frigida	1
3	2	2	LG	Artemisia frigida	1
3	2	3	LG	Artemisia frigida	1
3	2	3	HG	Artemisia frigida	1
7	3	1	CK	Artemisia frigida	1
7	3	3	CK	Artemisia frigida	1
7	3	1	LG	Artemisia frigida	1
7	3	2	LG	Artemisia frigida	1
7	3	3	LG	Artemisia frigida	1
7	3	1	HG	Artemisia frigida	1
7	3	2	HG	Artemisia frigida	1
7	3	3	HG	Artemisia frigida	1
3	4	1	CK	Artemisia frigida	1
3	4	3	CK	Artemisia frigida	1
3	4	1	HG	Artemisia frigida	1
3	4	3	HG	Artemisia frigida	1
3	5	1	CK	Artemisia frigida	1
3	5	2	CK	Artemisia frigida	1
3	5	2	LG	Artemisia frigida	1
3	5	3	LG	Artemisia frigida	1
3	5	1	HG	Artemisia frigida	1
3	5	2	HG	Artemisia frigida	1
3	5	3	HG	Artemisia frigida	1
7	6	1	LG	Artemisia frigida	1
7	6	2	LG	Artemisia frigida	1
7	6	1	HG	Artemisia frigida	1
7	6	2	HG	Artemisia frigida	1
7	6	3	HG	Artemisia frigida	1
3	2	1	CK	Allium mongolicum	1
3	2	2	CK	Allium mongolicum	1
3	2	3	CK	Allium mongolicum	1
3	2	1	LG	Allium mongolicum	1
3	2	2	LG	Allium mongolicum	1
3	2	3	LG	Allium mongolicum	1
3	2	1	HG	Allium mongolicum	1
3	2	3	HG	Allium mongolicum	1
7	3	1	CK	Allium mongolicum	1
7	3	1	LG	Allium mongolicum	1
7	3	2	LG	Allium mongolicum	1
7	3	3	LG	Allium mongolicum	1
7	3	3	HG	Allium mongolicum	1
3	4	1	CK	Allium mongolicum	1
3	4	2	CK	Allium mongolicum	1
3	4	1	LG	Allium mongolicum	1
3	4	2	LG	Allium mongolicum	1
3	4	3	LG	Allium mongolicum	1
3	4	1	HG	Allium mongolicum	1
3	4	2	HG	Allium mongolicum	1
7	1	1	CK	Allium mongolicum	1
7	1	1	HG	Allium mongolicum	1
7	1	1	CK	Kochia prostrata	1
7	1	1	LG	Kochia prostrata	1
7	1	2	LG	Kochia prostrata	1
7	1	3	LG	Kochia prostrata	1
7	3	1	CK	Kochia prostrata	1
7	3	2	CK	Kochia prostrata	1
7	3	1	LG	Kochia prostrata	1
7	3	2	LG	Kochia prostrata	1
3	2	2	CK	Artemisia xerophytica	1
3	2	1	LG	Artemisia xerophytica	1
3	2	2	CK	Ajania trifida	1
3	2	3	CK	Ajania trifida	1
3	2	1	LG	Ajania trifida	1
3	2	2	LG	Ajania trifida	1
3	2	3	LG	Ajania trifida	1
3	5	1	HG	Ajania trifida	1
3	5	3	HG	Ajania trifida	1
3	2	2	CK	Peganum nigellastrum	1
3	2	1	LG	Peganum nigellastrum	1
3	2	1	CK	Peganum nigellastrum	1
3	2	3	CK	Peganum nigellastrum	1
3	2	3	LG	Peganum nigellastrum	1
7	3	3	CK	Peganum nigellastrum	1
7	3	1	HG	Peganum nigellastrum	1
7	3	2	HG	Peganum nigellastrum	1
3	5	3	CK	Peganum nigellastrum	1
3	5	1	LG	Peganum nigellastrum	1
3	5	2	LG	Peganum nigellastrum	1
3	5	3	LG	Peganum nigellastrum	1
3	5	1	HG	Peganum nigellastrum	1
3	5	2	HG	Peganum nigellastrum	1
3	5	3	HG	Peganum nigellastrum	1
7	6	1	LG	Peganum nigellastrum	1
3	2	2	CK	Ajania achilleoides	1
3	2	3	CK	Ajania achilleoides	1
3	2	1	LG	Ajania achilleoides	1
3	2	3	LG	Ajania achilleoides	1
3	2	1	HG	Ajania achilleoides	1
3	2	3	HG	Ajania achilleoides	1
3	5	1	CK	Ajania achilleoides	1
3	5	2	CK	Ajania achilleoides	1
3	4	3	CK	Aristida adscensionis	1
3	4	1	LG	Aristida adscensionis	1
3	4	2	LG	Aristida adscensionis	1
3	4	3	LG	Aristida adscensionis	1
3	5	1	LG	Aristida adscensionis	1
3	5	3	LG	Aristida adscensionis	1
3	5	1	HG	Aristida adscensionis	1
3	5	2	HG	Aristida adscensionis	1
3	5	3	HG	Aristida adscensionis	1
7	3	2	CK	Agropyron desertorum	1
7	3	2	HG	Agropyron desertorum	1
7	3	3	HG	Agropyron desertorum	1
3	4	2	LG	Agropyron desertorum	1
3	2	2	LG	Echinops gmelini	1
3	2	1	HG	Echinops gmelini	1
3	2	2	HG	Echinops gmelini	1
3	2	3	HG	Echinops gmelini	1
3	5	2	LG	Echinops gmelini	1
7	6	1	LG	Echinops gmelini	1
7	6	2	LG	Echinops gmelini	1
7	6	3	LG	Echinops gmelini	1
7	6	2	HG	Echinops gmelini	1
7	6	3	HG	Echinops gmelini	1
7	3	3	CK	Messerschmidia sibirica	1
7	6	1	HG	Messerschmidia sibirica	1
3	2	1	HG	Stipa tianschanica	1
3	2	2	HG	Stipa tianschanica	1
3	2	3	HG	Stipa tianschanica	1
3	4	3	CK	Stipa tianschanica	1
3	5	2	LG	Stipa tianschanica	1
3	5	3	LG	Stipa tianschanica	1
7	6	1	LG	Stipa tianschanica	1
7	6	2	LG	Stipa tianschanica	1
7	6	3	LG	Stipa tianschanica	1
3	4	1	HG	Salsola laricifolia	1
3	4	3	HG	Salsola laricifolia	1
7	1	1	CK	Ceratoides latens	1
7	1	1	LG	Ceratoides latens	1
7	1	2	LG	Ceratoides latens	1
7	1	3	LG	Ceratoides latens	1
3	2	1	CK	Ceratoides latens	1
7	1	1	CK	Cleistogenes songorica	1
7	1	1	LG	Cleistogenes songorica	1
7	1	2	LG	Cleistogenes songorica	1
7	1	3	LG	Cleistogenes songorica	1
3	2	2	LG	Cleistogenes songorica	1
3	2	1	HG	Cleistogenes songorica	1
3	2	2	HG	Cleistogenes songorica	1
3	2	3	HG	Cleistogenes songorica	1
7	3	1	CK	Cleistogenes songorica	1
7	3	3	CK	Cleistogenes songorica	1
7	3	1	LG	Cleistogenes songorica	1
7	6	1	LG	Cleistogenes songorica	1
7	6	2	LG	Cleistogenes songorica	1
3	5	1	LG	Bassia dasyphylla	1
7	3	2	CK	Allium tenuissimum	1
7	3	3	LG	Allium tenuissimum	1
7	3	1	HG	Allium tenuissimum	1
7	1	1	CK	Caragana stenophylla	1
7	1	1	HG	Caragana stenophylla	1
3	2	1	CK	Caragana stenophylla	1
3	2	2	CK	Caragana stenophylla	1
3	2	3	CK	Caragana stenophylla	1
3	2	1	LG	Caragana stenophylla	1
3	2	2	LG	Caragana stenophylla	1
3	2	3	LG	Caragana stenophylla	1
3	2	1	HG	Caragana stenophylla	1
3	2	2	HG	Caragana stenophylla	1
3	2	3	HG	Caragana stenophylla	1
7	3	1	CK	Caragana stenophylla	1
7	3	3	CK	Caragana stenophylla	1
7	3	1	LG	Caragana stenophylla	1
7	3	2	LG	Caragana stenophylla	1
7	3	3	LG	Caragana stenophylla	1
7	3	1	HG	Caragana stenophylla	1
7	3	2	HG	Caragana stenophylla	1
7	3	3	HG	Caragana stenophylla	1
3	4	1	CK	Caragana stenophylla	1
3	4	2	CK	Caragana stenophylla	1
3	4	3	CK	Caragana stenophylla	1
3	4	2	LG	Caragana stenophylla	1
3	4	3	LG	Caragana stenophylla	1
3	4	2	HG	Caragana stenophylla	1
3	4	3	HG	Caragana stenophylla	1
7	6	1	LG	Caragana stenophylla	1
7	6	2	LG	Caragana stenophylla	1
7	6	3	LG	Caragana stenophylla	1
7	6	1	HG	Caragana stenophylla	1
7	6	2	HG	Caragana stenophylla	1
7	6	3	HG	Caragana stenophylla	1
7	1	1	CK	Eragrostis minor	1
7	3	1	HG	Eragrostis minor	1
3	4	2	HG	Eragrostis minor	1
7	6	2	HG	Eragrostis minor	1
7	6	3	HG	Eragrostis minor	1
3	2	1	CK	Caragana microphylla	1
3	2	2	CK	Caragana microphylla	1
3	2	3	CK	Caragana microphylla	1
3	2	1	LG	Caragana microphylla	1
3	2	2	LG	Caragana microphylla	1
3	2	3	LG	Caragana microphylla	1
3	2	2	HG	Caragana microphylla	1
3	2	3	HG	Caragana microphylla	1
7	3	1	CK	Caragana microphylla	1
7	3	2	CK	Caragana microphylla	1
7	3	3	CK	Caragana microphylla	1
3	4	1	CK	Caragana microphylla	1
3	4	2	CK	Caragana microphylla	1
3	4	3	CK	Caragana microphylla	1
3	4	1	LG	Caragana microphylla	1
7	1	1	CK	Stipa klemenzii	1
7	1	1	HG	Stipa klemenzii	1
7	3	3	HG	Stipa klemenzii	1
3	5	3	CK	Puccinellia tenuiflora	1
7	3	3	LG	Leymus chinensis	1
3	5	3	LG	Leymus chinensis	1
3	4	2	LG	Cleistogenes chinensis	1
3	4	2	CK	Corispermum declinatum	1
7	6	3	LG	Corispermum declinatum	1
7	3	1	HG	Ptilotricum canescens	1
7	3	3	HG	Ptilotricum canescens	1
7	3	1	CK	Neopallasia pectinata	1
7	3	2	CK	Neopallasia pectinata	1
7	3	3	CK	Neopallasia pectinata	1
7	3	2	LG	Neopallasia pectinata	1
7	3	1	HG	Neopallasia pectinata	1
7	3	2	HG	Neopallasia pectinata	1
3	4	1	HG	Neopallasia pectinata	1
7	1	1	CK	Salsola collina	1
7	1	1	LG	Salsola collina	1
7	1	2	LG	Salsola collina	1
7	1	3	LG	Salsola collina	1
3	2	1	CK	Salsola collina	1
3	2	2	CK	Salsola collina	1
3	2	3	CK	Salsola collina	1
3	2	1	LG	Salsola collina	1
3	2	2	LG	Salsola collina	1
3	2	3	LG	Salsola collina	1
3	2	1	HG	Salsola collina	1
3	2	2	HG	Salsola collina	1
3	2	3	HG	Salsola collina	1
3	4	1	CK	Salsola collina	1
3	4	2	CK	Salsola collina	1
3	4	1	LG	Salsola collina	1
3	4	2	LG	Salsola collina	1
3	4	3	LG	Salsola collina	1
3	4	1	HG	Salsola collina	1
3	4	2	HG	Salsola collina	1
3	4	3	HG	Salsola collina	1
7	6	2	HG	Salsola collina	1
7	3	1	CK	Salsola collina	1
7	3	2	CK	Salsola collina	1
7	3	3	CK	Salsola collina	1
3	4	2	CK	Salsola collina	1
3	4	3	CK	Salsola collina	1
3	5	3	CK	Salsola collina	1
3	5	1	LG	Salsola collina	1
3	5	3	LG	Salsola collina	1
7	6	1	LG	Salsola collina	1
7	6	3	LG	Salsola collina	1
